# Supplementary material for: ATP11B deficiency leads to impairment of hippocampal synaptic plasticity
Source: PubMed Central journal article supplement — J Mol Cell Biol. 2019 Jun 1;11(8):688–702. doi: 10.1093/jmcb/mjz042 (PMC7261485; doi:10.1093/jmcb/mjz042), 2019-06-01
Supplement: supplementary_material_mjz042.pdf [file supplementary_material_mjz042.pdf]

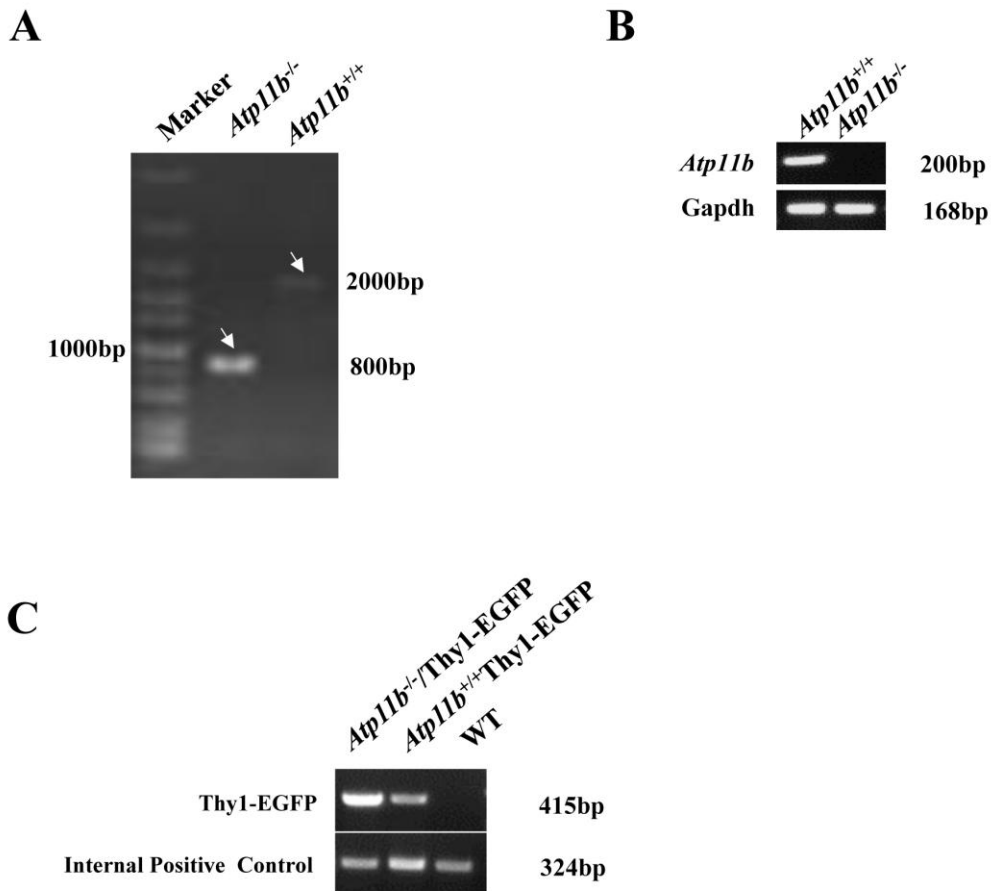

**Supplementary Figure S1. The generation of *Atp11b*-knockout mice.**

(A) Verification of exon 13–15 deletion at the genomic level by PCR (primer P5/P6). Presence of an 800-bp band and lack of a 2000-bp band indicate removal of exons 13–15 from the genomic DNA. (B) RT-PCR analysis of ATP11B expression. The absence of an ATP11B fragment confirms the gene of *Atp11b* was successfully knockout. (C) *Atp11b*<sup>-/-</sup>/Thy1-EGFP mice were identified by PCR (primer PT upstream/PT downstream and primer PI upstream/PI downstream), with the presence of a 415-bp band and an internal positive control of a 324-bp band. The primer sequences are shown in Supplementary Table S1.

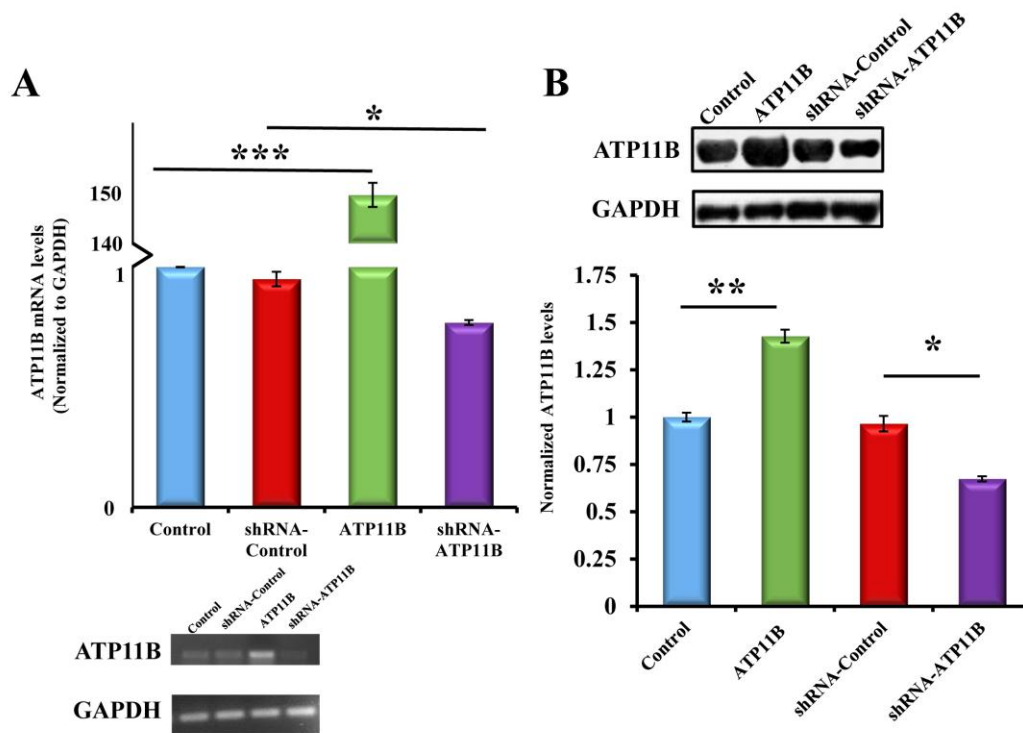

**Supplementary Figure S2. Overexpression and knockdown of the *Atp11b* gene in primary hippocampal neurons.**

(A) The mRNA expression level of *Atp11b* was assessed by qPCR in primary hippocampal neurons with the following four groups: Control, ATP11B overexpression (ATP11B), shRNA-Control, and ATP11B silencing (shRNA-ATP11B). GAPDH was used as the internal control. Bottom: the qPCR products were separated on the agarose gel. (B) The protein expression level of ATP11B was assessed by Western blotting in primary hippocampal neurons in the following four groups: Control, ATP11B overexpression (ATP11B), shRNA-Control, and ATP11B silencing (shRNA-ATP11B), showing successful overexpression and knockdown of ATP11B protein in primary hippocampal neurons. Bottom: the statistical analysis of the data that are expressed as a percentage of the control relative to GAPDH after background subtraction. Data are expressed as the mean  $\pm$  SEM. One-way ANOVA; \* $P < 0.05$ , \*\* $P < 0.01$ , \*\*\* $P < 0.001$ .

**Table S1: List of primers used for verification of genotype**

---

| <b>Gene name</b>                      | <b>Primer sequence (5' to 3')</b>                                             |
|---------------------------------------|-------------------------------------------------------------------------------|
| <i>P5</i>                             | CATTGAGAGAGATGCTTTCC                                                          |
| <i>P6</i>                             | TGACAACAGGTTCCCTCAG                                                           |
| <i>Thy1-EGFP (PT)</i>                 | Upstream : ACAGACACACACCCAGGACA<br>Downstream : CGGTGGTGCAGATGAACTT           |
| <i>Internal Positive Control (PI)</i> | Upstream : CTAGGCCACAGAATTGAAAGATCT<br>Downstream : GTAGGTGGAAATTCTAGCATCATCC |

---
